# Supplementary material for: Extended use of rh-endostatin improves prognosis in patients with advanced non-small cell lung cancer: an analysis of retrospective study
Source: PubMed Central journal article supplement — J Thorac Dis. 2022 Nov;14(11):4416–26. doi: 10.21037/jtd-22-1292 (PMC9745542; doi:10.21037/jtd-22-1292), 2022-11
Supplement: jtd-14-11-4416-dss.pdf [file jtd-14-11-4416-dss.pdf]

## Data Sharing Statement

|                     |                                                                                                                                                     |                                                                                                       |
|---------------------|-----------------------------------------------------------------------------------------------------------------------------------------------------|-------------------------------------------------------------------------------------------------------|
| <b>Article Info</b> | <a href="https://dx.doi.org/10.21037/jtd-22-1292">https://dx.doi.org/10.21037/jtd-22-1292</a>                                                       |                                                                                                       |
| <b>Item</b>         | <b>Question</b>                                                                                                                                     | <b>Authors' Response<br/>(place "-" if not applicable)</b>                                            |
| 1                   | Would you like to share data collected for your study to others?                                                                                    | We'd like to share part of the raw data for readers.                                                  |
| 2                   | If not, would you like to share the reason for your decision?                                                                                       | -                                                                                                     |
| 3                   | What data in particular will be shared?                                                                                                             | Survival plots for subgroups will be shared.                                                          |
| 4                   | Any other documents will be shared? Such as study protocol, statistical analysis plan, informed consent form, clinical study report, analytic code. | Yes.                                                                                                  |
| 5                   | When will data availability begin?                                                                                                                  | From the publication date.                                                                            |
| 6                   | When will data availability end?                                                                                                                    | Two years within the publication date, since the technique or survival data may be updated over time. |
| 7                   | To whom will you share the data?                                                                                                                    | All the readers.                                                                                      |
| 8                   | For what type of analysis or purpose?                                                                                                               | For their analysis or paper publishing in NSCLC patients treated with rh-endostatin.                  |
| 9                   | How or where can the data/documents be obtained?                                                                                                    | Emails could be sent to the address below to obtain the shared data: jzhao@tjh.tjmu.edu.cn            |
| 10                  | Any other restrictions?                                                                                                                             | None.                                                                                                 |
